# Supplementary material for: Iron-doped novel Co-based metal–organic frameworks for preparation of bifunctional catalysts with an amorphous structure for OER/HER in alkaline solution
Source: Royal Society of Chemistry journal article supplement (doi:10.1039/d2dt01837c), 2022-01-01
Supplement: d2dt01837c1.pdf [file d2dt01837c1.pdf]

**Supporting Information**

**Iron-doped novel Co-based metal-organic frameworks for  
preparation of bifunctional catalysts with amorphous  
structure for OER/HER in alkaline solution**

Siyu Dai<sup>a</sup>, Yuqi Liu<sup>a\*</sup>, Kaiming Wang<sup>a</sup>, Yanghua Li<sup>a</sup>, Nanhao Jin<sup>a</sup>, Xinying Wang<sup>a\*</sup>,  
Huiling Luo<sup>c</sup>, Huiling Luo<sup>c</sup>, Wei Li<sup>a,b</sup>.

<sup>a</sup> Faculty of Science, Kunming University of Science and Technology, Kunming 650500, P. R. China

<sup>b</sup> Faculty of Metallurgical and Energy Engineering, Kunming University of Science and Technology, Kunming 650093, P. R. China

<sup>c</sup> Faculty of Civil Engineering and Mechanics, Kunming University of Science and Technology, Kunming 650093, P. R. China

\*corresponding author: Yuqi Liu (liuyuqi7547@163.com); Xinying Wang(1447448766@qq.com)

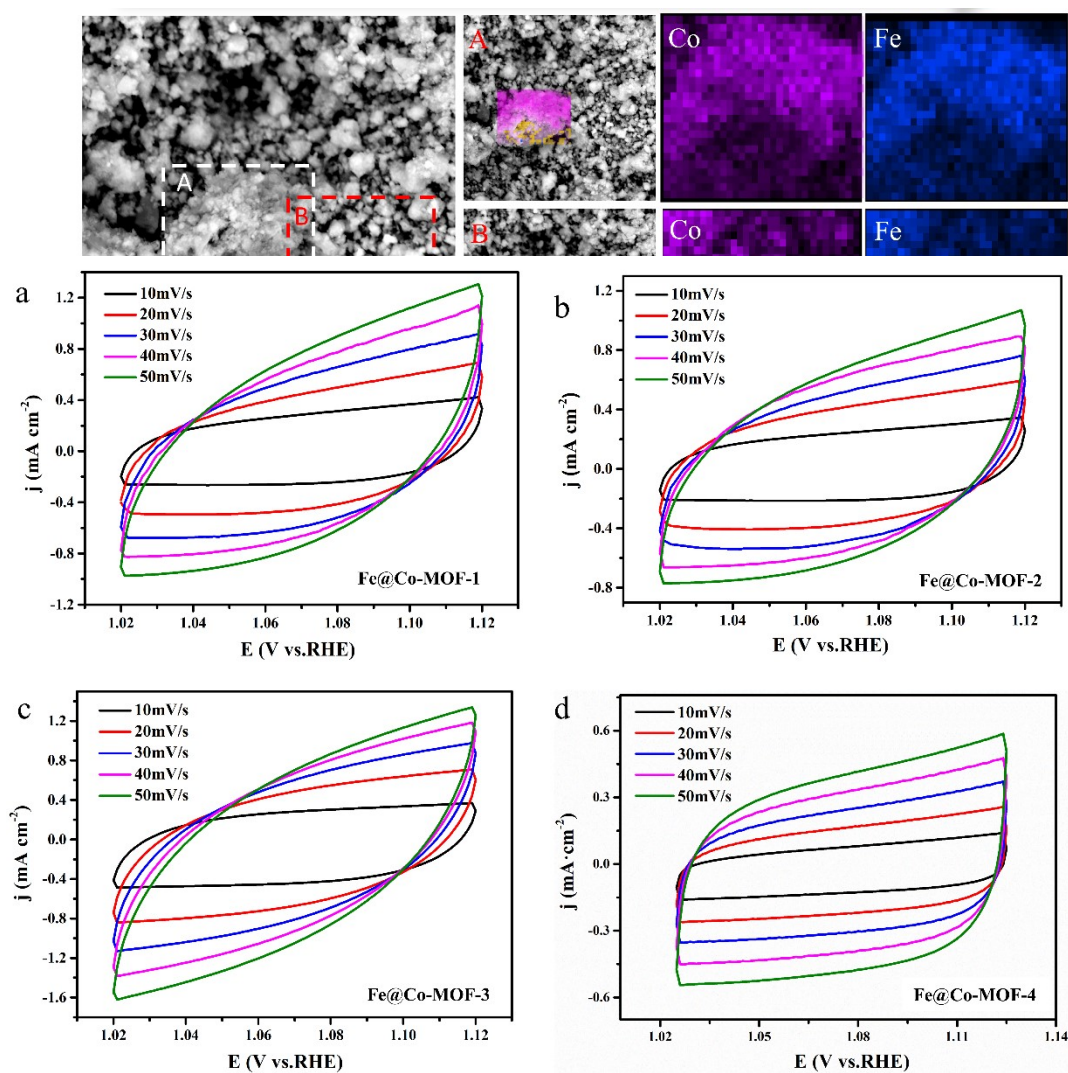

Figure S8. Cyclic voltammograms (CV) of **a)** Fe@Co-MOF-1. **b)** Fe@Co-MOF-2. **c)** Fe@Co-MOF-3. **d)** Fe@Co-MOF-4.

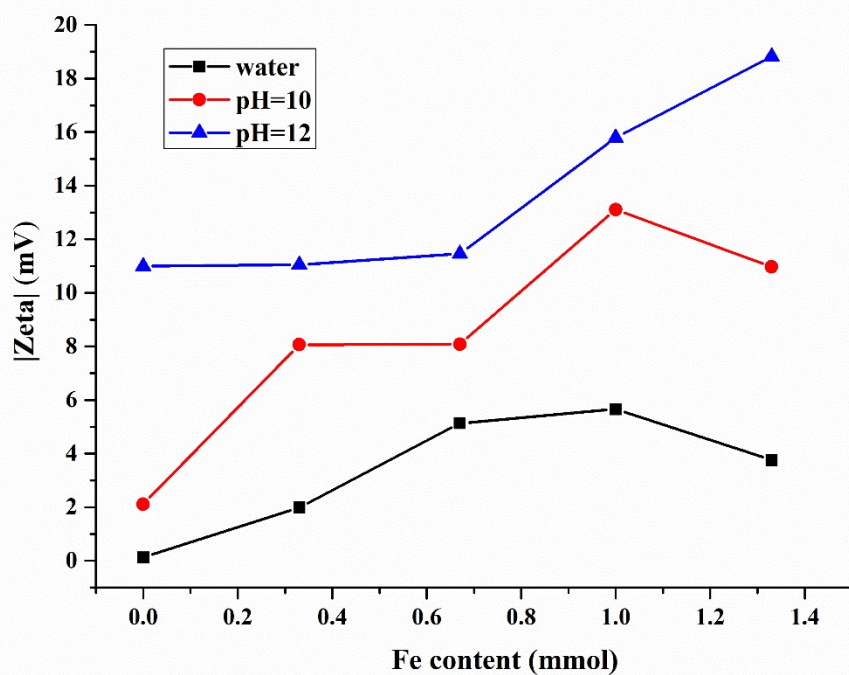

Figure S9. Zeta potential measurement data for Co-MOF, Fe@Co-MOF-1, Fe@Co-MOF-2, Fe@Co-MOF-3 and Fe@Co-MOF-4.

Table S1. List of ingredients for different catalysts.

|             | Co-MOF   | FeSO <sub>4</sub> •7H <sub>2</sub> O |
|-------------|----------|--------------------------------------|
| Co-MOF      | 0.1 mmol | 0                                    |
| Fe@Co-MOF-1 | 0.1 mmol | 0.033 mmol                           |
| Fe@Co-MOF-2 | 0.1 mmol | 0.066 mmol                           |
| Fe@Co-MOF-3 | 0.1 mmol | 0.1 mmol                             |
| Fe@Co-MOF-4 | 0.1 mmol | 0.133 mmol                           |

Table S2. Crystallographic data and structural refinements for Co-MOF.

| Compound             | Co                                                              |
|----------------------|-----------------------------------------------------------------|
| chemical formula     | C <sub>26</sub> H <sub>16</sub> CoN <sub>6</sub> O <sub>5</sub> |
| formula weight       | 697.57                                                          |
| crystal size (mm)    | 0.11                                                            |
| temperature (K)      | 273(2)                                                          |
| radiation            | 0.71073                                                         |
| crystal system       | Monoclinic                                                      |
| space group          | P2 <sub>1</sub> /c                                              |
| Unit cell dimensions | <i>a</i> =13.942(2) (Å)<br><i>b</i> =13.1857(19) (Å)            |

|                                          |                                                               |
|------------------------------------------|---------------------------------------------------------------|
|                                          | $c=18.636(3)$ (Å)                                             |
|                                          | $\alpha=90.00^\circ$                                          |
|                                          | $\beta=111.414(3)^\circ$                                      |
|                                          | $\gamma=90.00^\circ$                                          |
| Volume/ $V(\text{Å}^3)$                  | 3189.5(8)                                                     |
| Z                                        | 4                                                             |
| $\rho(\text{calc})$ (g/cm <sup>3</sup> ) | 1.453                                                         |
| F (000)                                  | 1444.0                                                        |
| $\mu$ (mm <sup>-1</sup> )                | 0.600                                                         |
| $\theta$ range (deg)                     | 1.569 to 25.008                                               |
| Independent reflections                  | 15957 ( $R_{\text{int}}=0.0666$ , $R_{\text{sigma}}=0.0852$ ) |
| Data/restraints/parameters               | 5615/ 231/ 485                                                |
| GOF                                      | 0.991                                                         |
| $R_1/wR_2$ [ $I > 2\sigma(I)$ ]          | 0.0548/ 0.1224                                                |
| $R_1/wR_2$ (all data)                    | 0.1098/ 0.1534                                                |
| large peak and hole(e/Å <sup>3</sup> )   | 0.379/ -0.443                                                 |

Table S3. Selected Bond lengths (Å) and Angles (°) for Co-MOF.

| Parameter           | Value      | Parameter           | Value      |
|---------------------|------------|---------------------|------------|
| Co(1)-O(4)#3        | 2.156(3)   | Co(1)-O(5)#3        | 2.192(3)   |
| Co(1)-O(1)          | 2.033(3)   | Co(1)-O(2)#2        | 2.019(3)   |
| Co(1)-N(6)#1        | 2.181(3)   | Co(1)-N(1)          | 2.151(3)   |
| O(4)#3-Co(1)-N(6)#1 | 90.31(12)  | O(2)#2-Co(1)-O(1)   | 116.88(11) |
| O(4)#3-Co(1)-O(5)#3 | 60.04(11)  | O(2)#2-Co(1)-N(6)#1 | 87.65(13)  |
| O(1)-Co(1)-O(4)#3   | 150.30(12) | O(2)#2-Co(1)-O(5)#3 | 152.38(12) |
| O(1)-Co(1)-N(6)#1   | 87.03(12)  | O(2)#2-Co(1)-N(1)   | 92.11(13)  |
| O(1)-Co(1)-O(5)#3   | 90.33(11)  | N(1)-Co(1)-O(4)#3   | 92.58(12)  |
| O(1)-Co(1)-N(1)     | 90.51(12)  | N(1)-Co(1)-N(6)#1   | 177.11(12) |
| N(6)#1-Co(1)-O(5)#3 | 89.21(12)  | N(1)-Co(1)-O(5)#3   | 92.33(12)  |
| O(2)#2-Co(1)-O(4)#3 | 92.53(12)  |                     |            |

Complex 1 Symmetry code: #1= x, 1+y, z; #2= -x, -y, -z; #3= 1+x, 1/2-y, 1/2+z.

Table S4. Hydrogen-bonding Geometry of Co-MOF. (Å and °)

| D-H...A        | D-H      | H...A    | [D...A]  | $\angle$ D-H...A |
|----------------|----------|----------|----------|------------------|
| C10-H10...O4#1 | 0.93(5)  | 2.6(3)   | 3.497(4) | 162.3(2)         |
| C17-H17...O5#2 | 0.929(5) | 2.559(3) | 3.386(7) | 148.4 (2)        |

Symmetry code: #1= -1-x, -1/2+y, -1/2-z; #2= -1-x, -y, -z

Table S5. The OER performance of recently reported most active MOFs-based catalysts in alkaline media.

| Number | Catalyst                                      | Electrolyte    | Overpotential (mV)                 | Ref.                    |
|--------|-----------------------------------------------|----------------|------------------------------------|-------------------------|
| 1      | <b>Fe@Co-MOF-3</b>                            | <b>1 M KOH</b> | <b>247 mV@50mA·cm<sup>-2</sup></b> | <b><i>This work</i></b> |
| 2      | <b>Co-MOF</b>                                 | <b>1 M KOH</b> | <b>315 mV@10mA·cm<sup>-2</sup></b> | <b><i>This work</i></b> |
| 3      | ZIF-FeCo/C                                    | 1 M KOH        | 250 mV@10mA·cm <sup>-2</sup>       | 1                       |
| 4      | ZIF-67/CoNiAl-LDH/NF                          | 1 M KOH        | 303 mV@10mA·cm <sup>-2</sup>       | 2                       |
| 5      | CoP-InNC@CNT                                  | 1 M KOH        | 270 mV@10mA·cm <sup>-2</sup>       | 3                       |
| 7      | FeCo-MNS-1.0                                  | 0.1 M KOH      | 367 mV@150mA·cm <sup>-2</sup>      | 4                       |
| 8      | CoP/NF                                        | 1 M KOH        | 317 mV@50mA·cm <sup>-2</sup>       | 5                       |
| 9      | FCO-Vo@NC                                     | 1 M KOH        | 318 mV@10mA·cm <sup>-2</sup>       | 6                       |
| 10     | CoCu-MOF NBs                                  | 1 M KOH        | 271 mV@10mA·cm <sup>-2</sup>       | 7                       |
| 11     | Fe <sub>2</sub> Ni MIL-88B                    | 1 M KOH        | 264 mV@10 mA·cm <sup>-2</sup>      | 8                       |
| 13     | CoNi MOF-mCNTs                                | 1 M KOH        | 306 mV@10mA·cm <sup>-2</sup>       | 9                       |
| 14     | Co <sub>3</sub> S <sub>4</sub> /EC-MOF        | 1 M KOH        | 336 mV@100mA·cm <sup>-2</sup>      | 10                      |
| 15     | CoNiFe LTHs                                   | 1 M KOH        | 262 mV@10mA·cm <sup>-2</sup>       | 11                      |
| 16     | 3DGS-Co <sub>3.0</sub> Cu <sub>1.0</sub> -MOF | 0.1 M KOH      | 460 mV@10mA·cm <sup>-2</sup>       | 12                      |
| 17     | CuCo-MOF                                      | 1 M KOH        | 340 mV@10mA·cm <sup>-2</sup>       | 13                      |
| 16     | Ni <sub>0.75</sub> Fe <sub>0.25</sub> BDC     | 1 M KOH        | 310 mV@10mA·cm <sup>-2</sup>       | 14                      |
| 15     | aCo(OH) <sub>2</sub> -ZIF-L/NF-40             | 0.1 M KOH      | 290 mV@100mA·cm <sup>-2</sup>      | 15                      |

## References

- Gu, X.; Ji, Y.-G.; Tian, J.; Wu, X.; Feng, L., Combined MOF derivation and fluorination imparted efficient synergism of Fe-Co fluoride for oxygen evolution reaction. *Chem Eng J* 2022, 427. <https://doi.org/10.1016/j.cej.2021.131576>
- Xu, J.; Zhao, Y.; Li, M.; Fan, G.; Yang, L.; Li, F., A strong coupled 2D metal-organic framework and ternary layered double hydroxide hierarchical nanocomposite as an excellent electrocatalyst for the oxygen evolution reaction. *Electrochim Acta* 2019, 307, 275-284. <https://doi.org/10.1016/j.electacta.2019.03.210>
- Chai, L.; Hu, Z.; Wang, X.; Xu, Y.; Zhang, L.; Li, T. T.; Hu, Y.; Qian, J.; Huang, S., Stringing Bimetallic Metal-Organic Framework-Derived Cobalt Phosphide Composite for High-Efficiency Overall Water Splitting. *Adv Sci (Weinh)* 2020, 7 (5), 1903195. <https://doi.org/10.1002/advs.201903195>
- Zhuang, L. Z.; Ge, L.; Liu, H. L.; Jiang, Z. R.; Jia, Y.; Li, Z. H.; Yang, D. J.; Hocking, R. K.; Li, M. R.; Zhang, L. Z.; Wang, X.; Yao, X. D.; Zhu, Z. H., A Surfactant-Free and Scalable General Strategy for Synthesizing Ultrathin Two-Dimensional Metal-Organic Framework Nanosheets for the

Oxygen Evolution Reaction. *Angew. Chem., Int. Ed.* 2019, 58 (38), 13565-13572.  
<https://doi.org/10.1002/anie.201907600>

5. Liu, J.; Gao, Y.; Tang, X.; Zhan, K.; Zhao, B.; Xia, B. Y.; Yan, Y., Metal-organic framework-derived hierarchical ultrathin CoP nanosheets for overall water splitting. *J. Mater. Chem. A* 2020, 8 (37), 19254-19261. <https://doi.org/10.1039/d0ta07616c>

6. Min, K.; Hwang, M.; Shim, S. E.; Lim, D.; Baeck, S.-H., Defect-rich Fe-doped Co<sub>3</sub>O<sub>4</sub> derived from bimetallic-organic framework as an enhanced electrocatalyst for oxygen evolution reaction. *Chem Eng J* 2021, 424. <https://doi.org/10.1016/j.cej.2021.130400>

7. Weiren Cheng, Z.-P. W., Deyan Luan, Shuang-Quan Zang, and Xiong Wen (David) Lou, Synergetic Cobalt-Copper-Based Bimetal-Organic Framework Nanoboxes toward Efficient Electrochemical Oxygen Evolution. *Angew. Chem. Int. Ed.* 2021, 60, 1-7.  
<https://doi.org/10.1002/anie.202112775>  
10.1002/ange.202112775

8. Abazari, R.; Sanati, S.; Morsali, A., Mixed Metal Fe<sub>2</sub>Ni MIL-88B Metal-Organic Frameworks Decorated on Reduced Graphene Oxide as a Robust and Highly Efficient Electrocatalyst for Alkaline Water Oxidation. *Inorg Chem* 2022. <https://doi.org/10.1021/acs.inorgchem.1c03216>

9. Yu, S.; Wu, Y.; Xue, Q.; Zhu, J.-J.; Zhou, Y., A novel multi-walled carbon nanotube-coupled CoNi MOF composite enhances the oxygen evolution reaction through synergistic effects. *J Mater Chem A* 2022. <https://doi.org/10.1039/d1ta10681c>

10. Liu, T.; Li, P.; Yao, N.; Kong, T.; Cheng, G.; Chen, S.; Luo, W., Self-Sacrificial Template-Directed Vapor-Phase Growth of MOF Assemblies and Surface Vulcanization for Efficient Water Splitting. *Adv. Mater.* 2019, 31 (21), 1806672. <https://doi.org/10.1002/adma.201806672>

11. Yu, R.; Liu, D.; Yuan, M.; Wang, Y.; Ye, C.; Li, J.; Du, Y., Universal MOF-Mediated synthesis of 2D CoNi-based layered triple hydroxides electrocatalyst for efficient oxygen evolution reaction. *J Colloid Interf Sci* 2021, 602, 612-618. <https://doi.org/10.1016/j.jcis.2021.06.035>

12. Wang, H.; Xie, A.; Li, X.; Wang, Q.; Zhang, W.; Zhu, Z.; Wei, J.; Chen, D.; Peng, Y.; Luo, S., Three-dimensional petal-like graphene Co<sub>3.0</sub>Cu<sub>1.0</sub> metal organic framework for oxygen evolution reaction. *J Alloy Compd* 2021, 884. <https://doi.org/10.1016/j.jallcom.2021.161144>

13. Liu, Q.; Chen, J.; Yu, F.; Wu, J.; Liu, Z.; Peng, B., Multifunctional book-like CuCo-MOF for highly sensitive glucose detection and electrocatalytic oxygen evolution. *New J Chem*, 2021, 45 (36),

16714-16721. <https://doi.org/10.1039/d1nj02931b>

14. Hao, Y.; Liu, Q.; Zhou, Y.; Yuan, Z.; Fan, Y.; Ke, Z.; Su, C. Y.; Li, G., A 2D NiFe Bimetallic Metal–Organic Frameworks for Efficient Oxygen Evolution Electrocatalysis. *Energy Environ Mater*, 2019, 2 (1), 18-21. <https://doi.org/10.1002/eem2.12024>

15. Ding, J.; Fan, T.; Shen, K.; Li, Y., Electrochemical synthesis of amorphous metal hydroxide microarrays with rich defects from MOFs for efficient electrocatalytic water oxidation. *Appl. Catal. B: Environ.* 2021, 292, 120174. <https://doi.org/10.1016/j.apcatb.2021.120174>
